# Supplementary material for: Tensor-Decomposition-Based Unsupervised Feature Extraction Applied to Prostate Cancer Multiomics Data
Source: MDPI journal article supplement (doi:10.3390/genes11121493), 2020-12-11
Supplement: s1 [file s1]

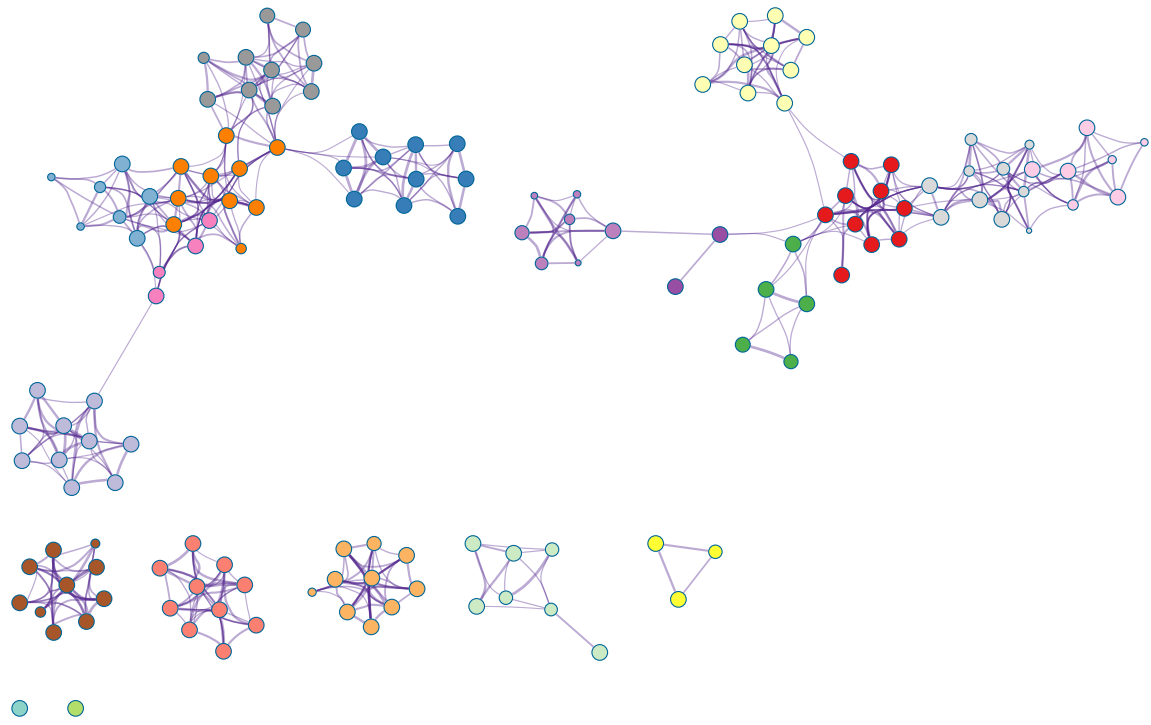

- chordate embryonic development
- blood vessel development
- gland development
- epithelial cell differentiation
- leukocyte differentiation
- fat cell differentiation
- response to wounding
- negative regulation of cell differentiation
- cell junction assembly
- Transcriptional misregulation in cancer
- muscle structure development
- regulation of neuron differentiation
- regulation of cellular amide metabolic process
- myeloid cell differentiation
- cellular response to steroid hormone stimulus
- negative regulation of cell proliferation
- ossification
- connective tissue development
- regulation of epithelial cell differentiation
- Signaling by Nuclear Receptors

 created by  
<http://metascape.org>
