# Supplementary figures and images for: Tensor-Decomposition-Based Unsupervised Feature Extraction Applied to Prostate Cancer Multiomics Data
Source: MDPI journal article supplement (doi:10.3390/genes11121493), 2020-12-11

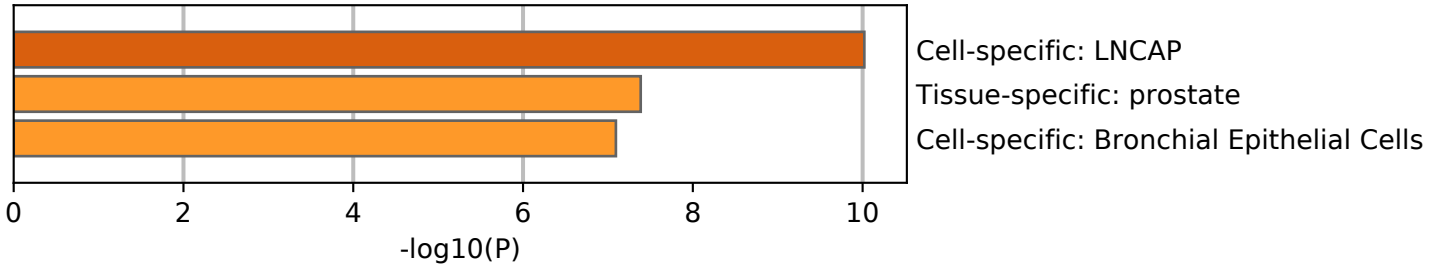

Supplement: s1 [file s1]

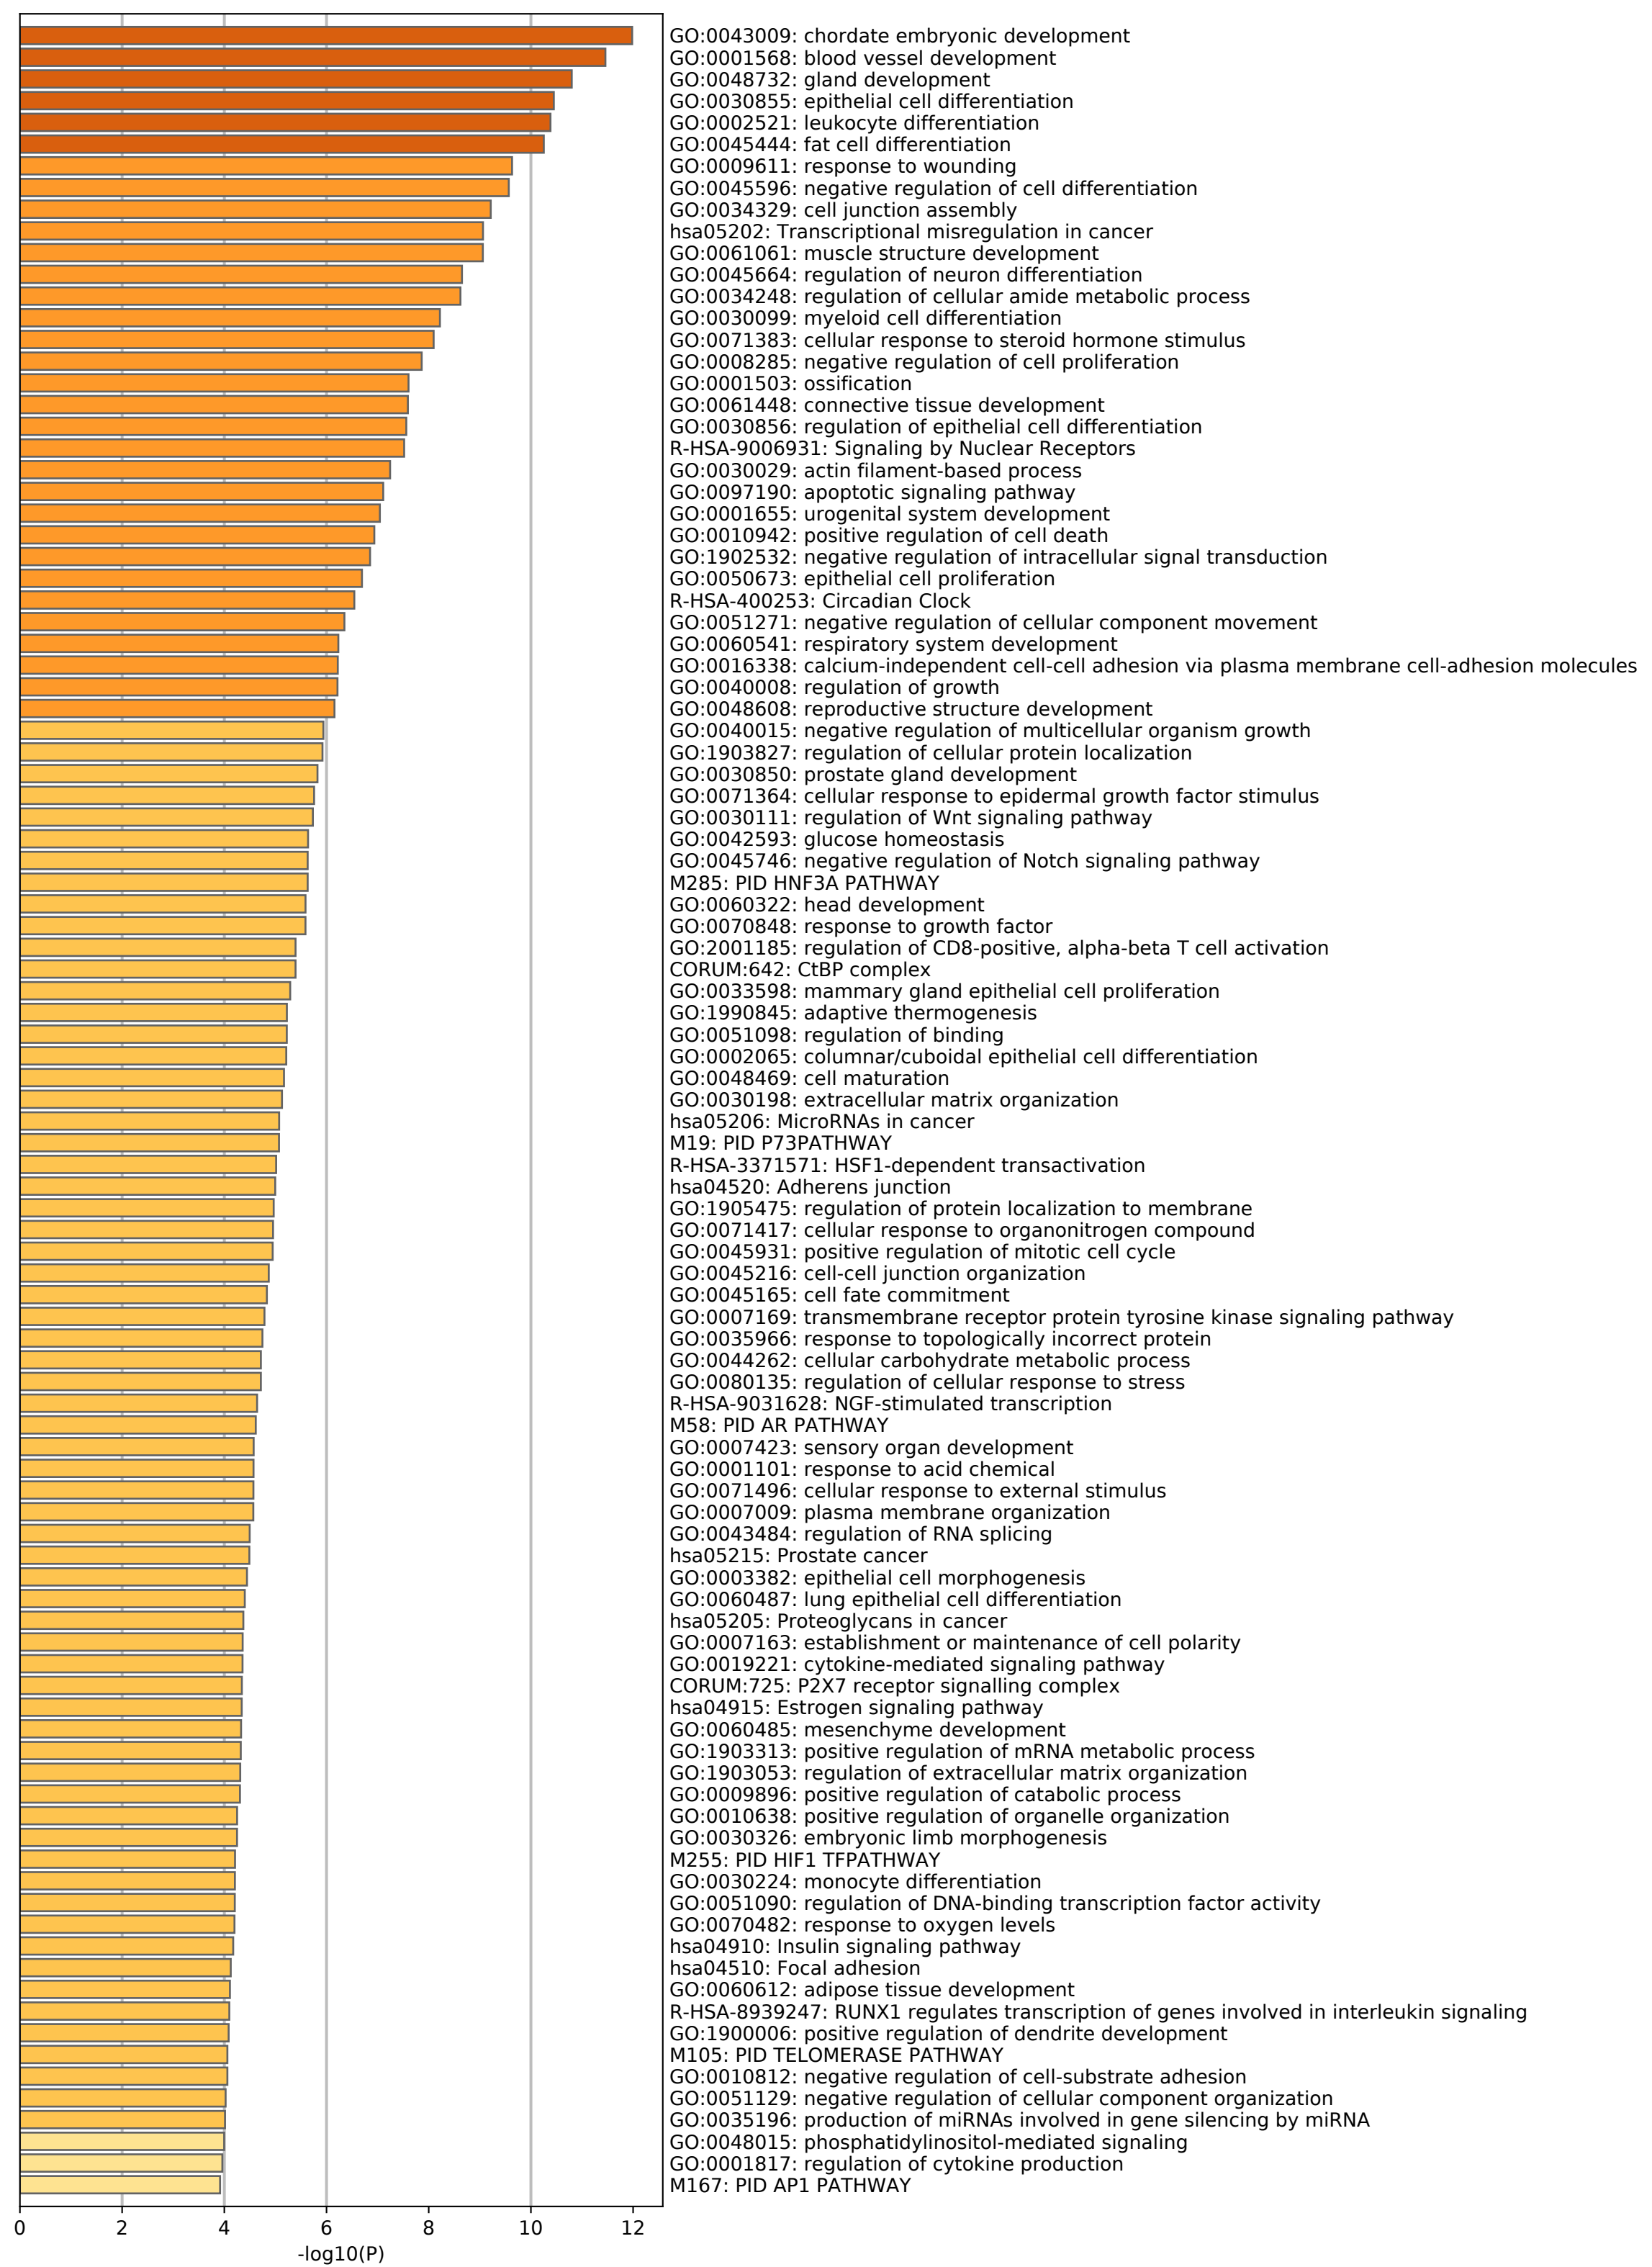

Supplement: s1 [file s1]

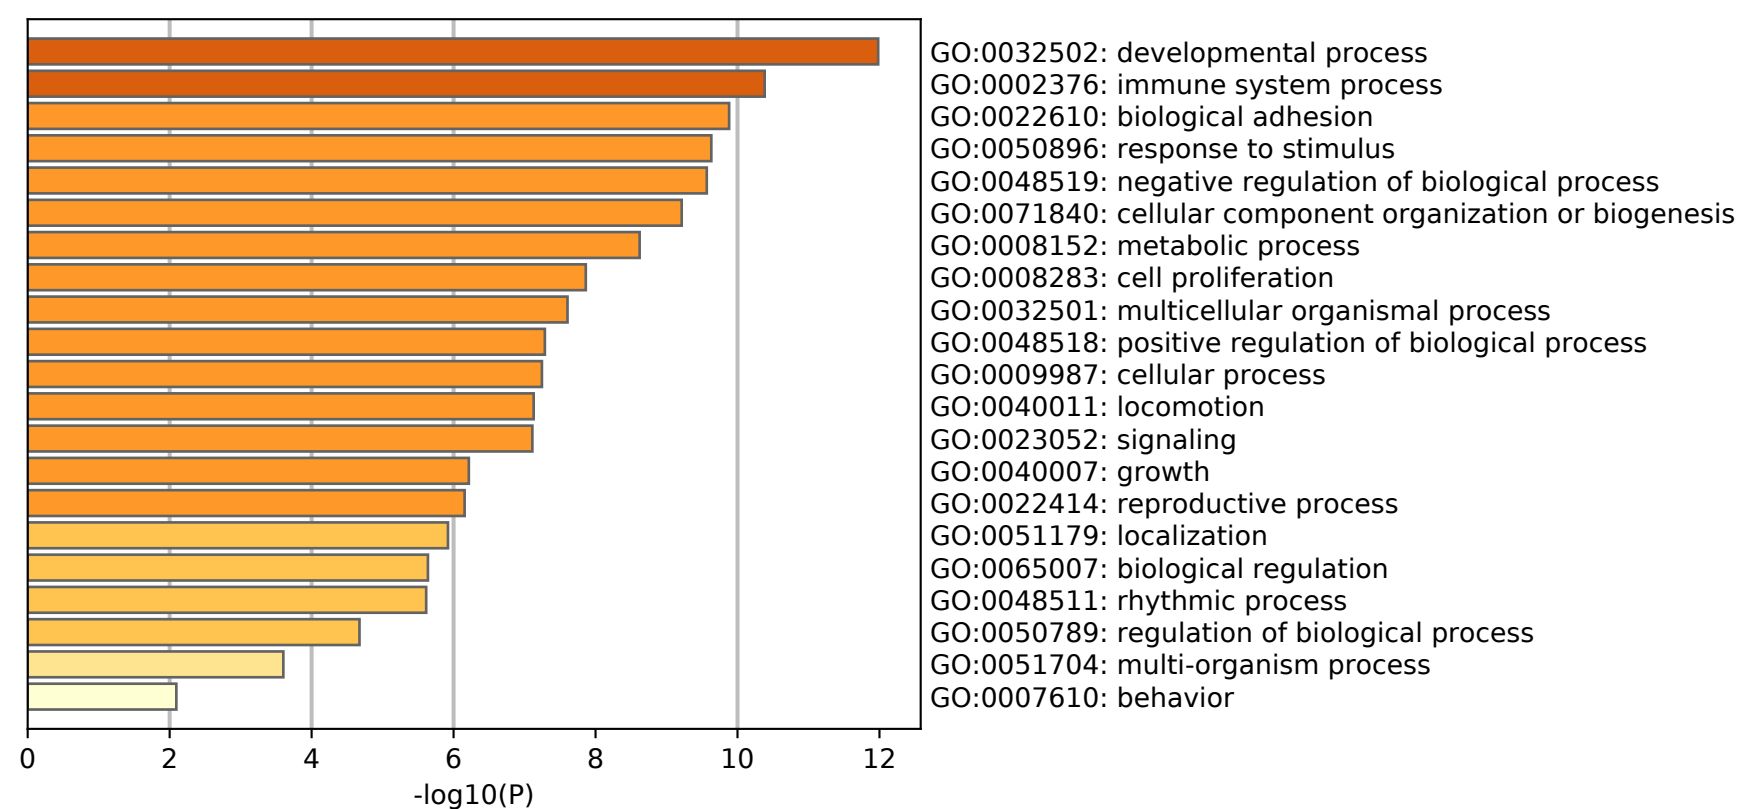

Supplement: s1 [file s1]

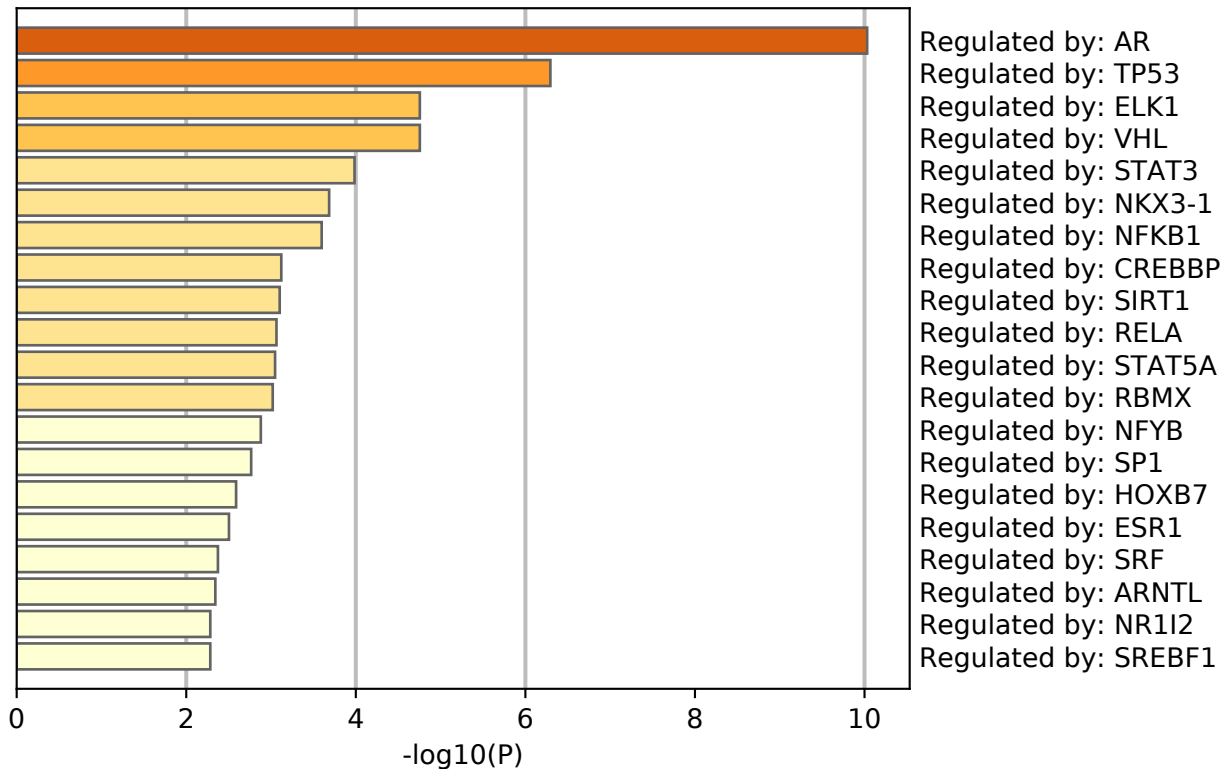

Supplement: s1 [file s1]

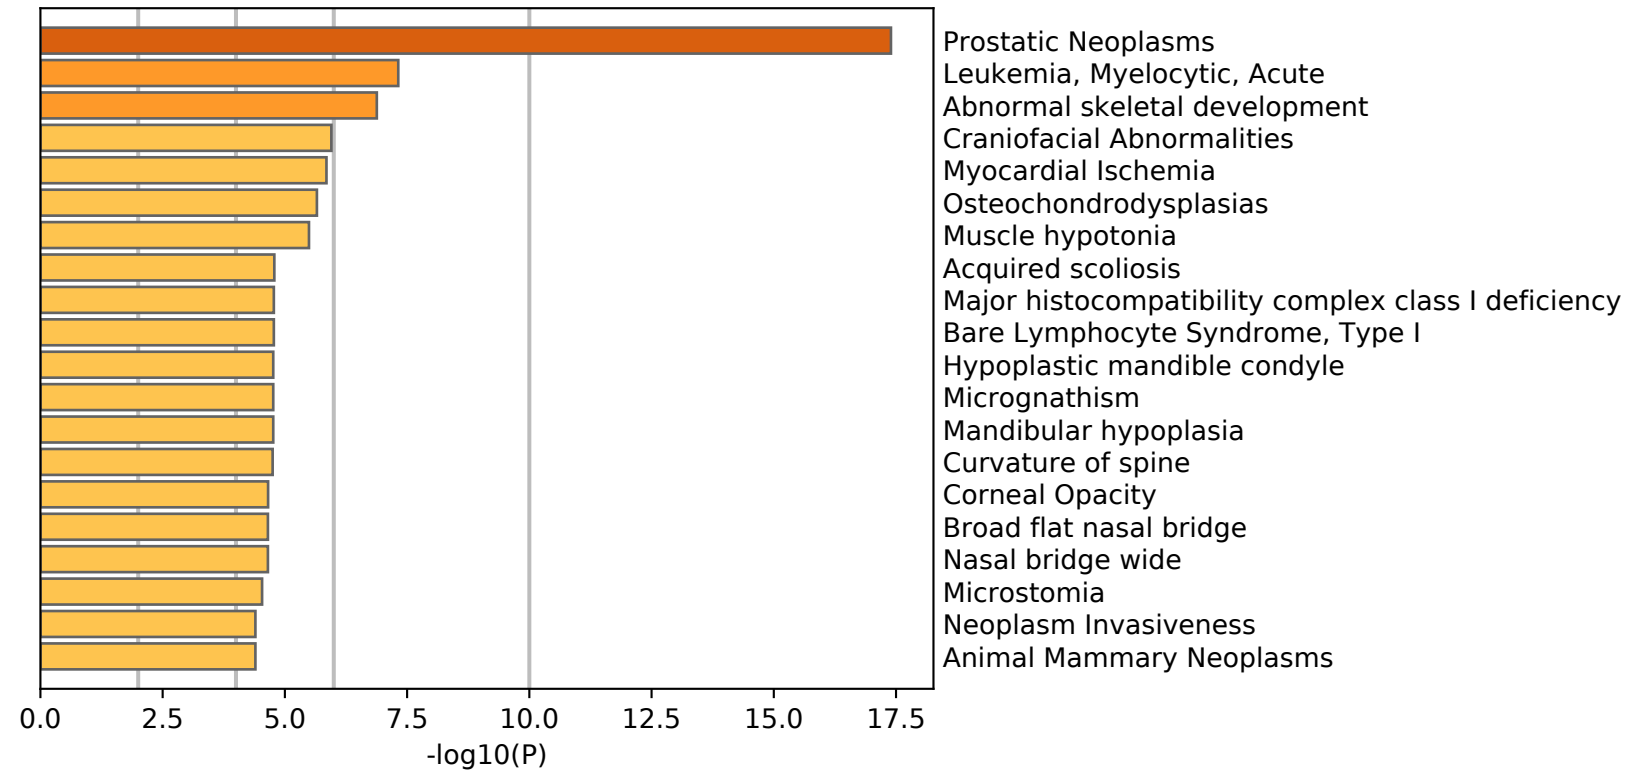

Supplement: s1 [file s1]

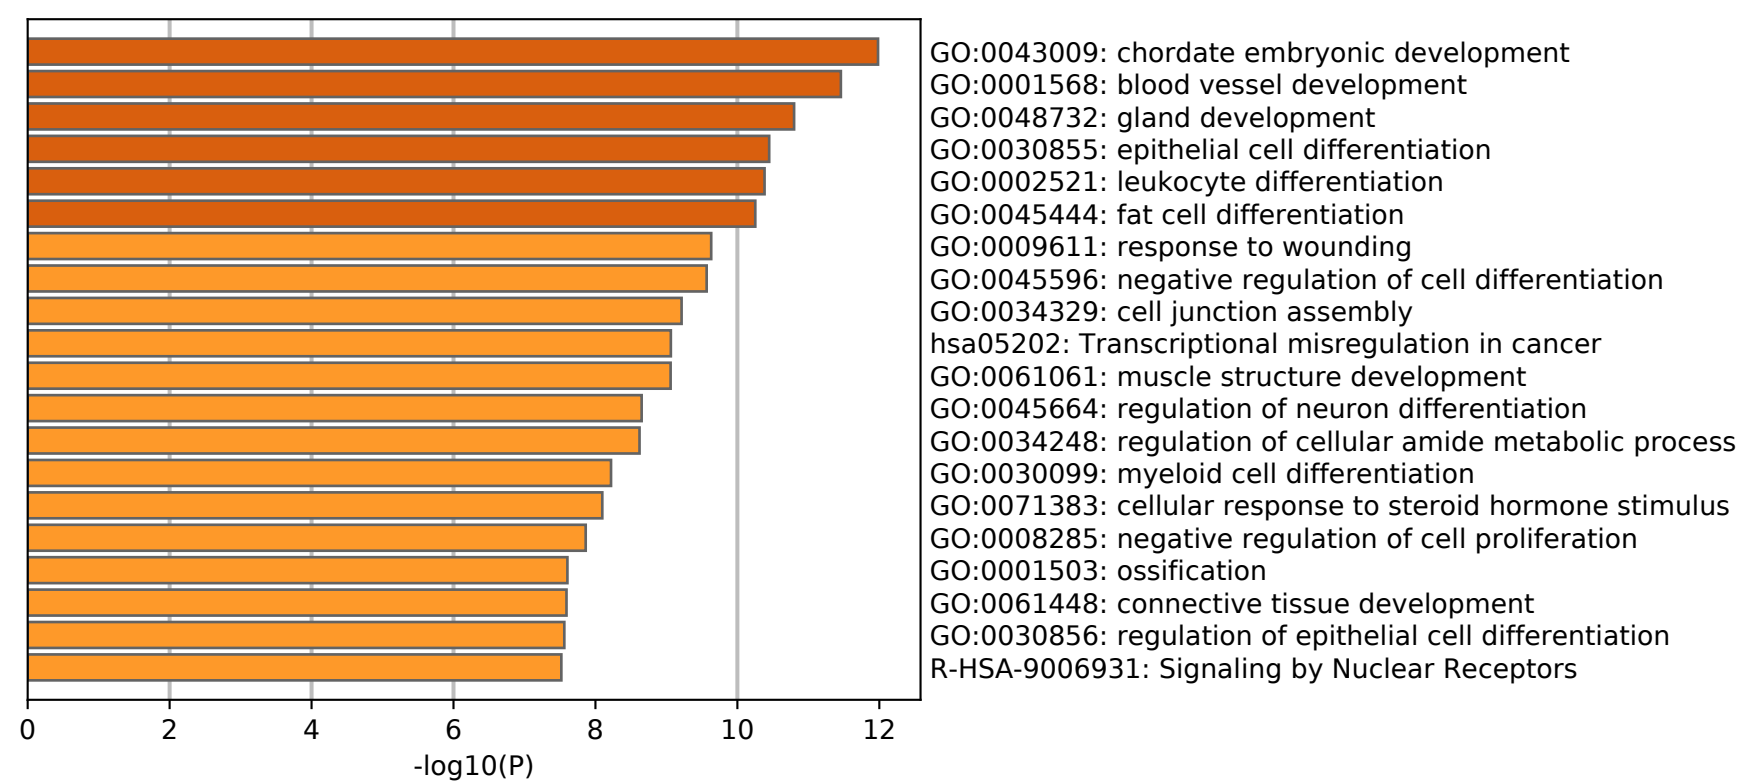

Supplement: s1 [file s1]

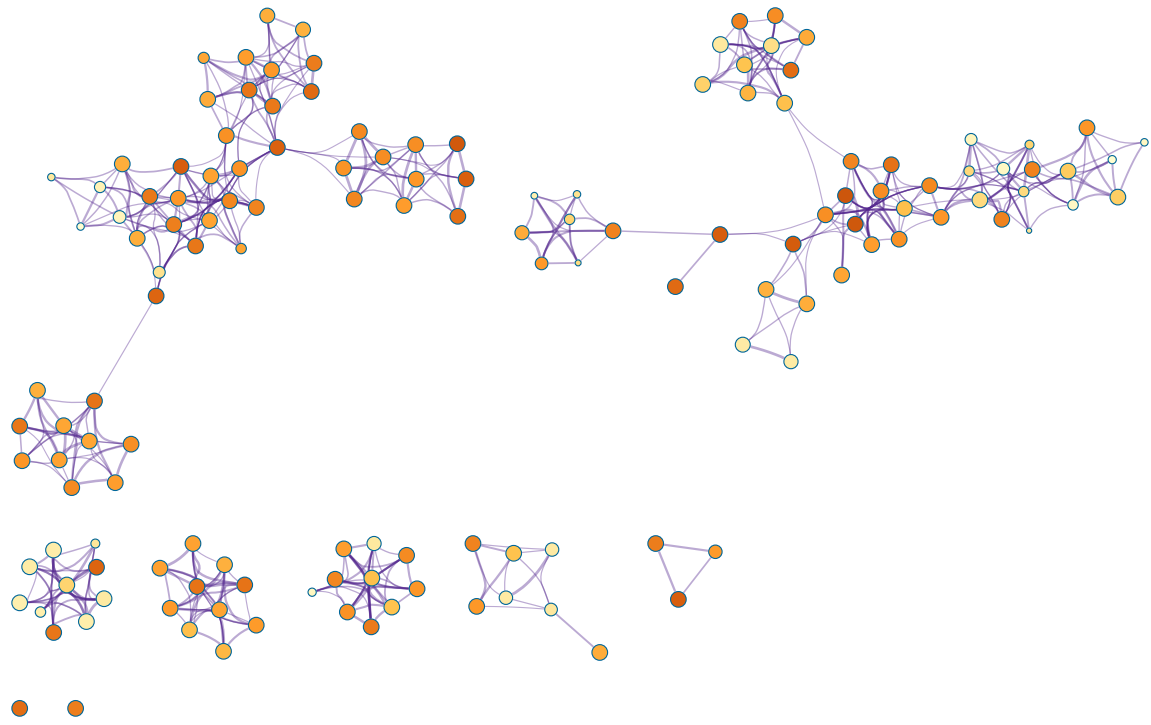

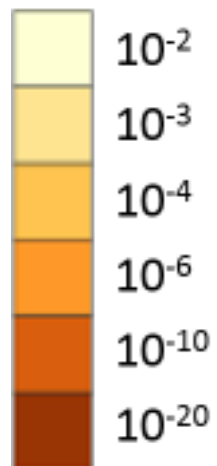

 created by  
<http://metascape.org>

Supplement: s1 [file s1]
